# Supplementary material
Source: PubMed Central journal article supplement (PMC10187811)

# Supplemental materials

## Search methods (supplemental)

*OVID: MEDLINE + EMBASE*

*((subdural hematoma or subdural haematoma or SDH or CSDH).af. AND (embolization or middle meningeal artery or MMA).af.*

*Web of Science: subdural hematoma OR subdural haematoma OR SDH OR CSDH (All Fields)  
AND embolization OR middle meningeal artery OR MMA (All Fields)*

*Cochrane Library: (subdural hematoma OR subdural haematoma OR SDH OR CSDH) AND  
(embolization OR middle meningeal artery OR MMA) (All Text)*

**Supplemental Table 1:** Details of included studies.

| <b>Study (<i>et al</i>), year</b> | <b>Design</b> | <b>Size</b> | <b>Country</b> | <b>Embolization agent</b>                                                                           | <b>PVA particle size, PVA +/- coils</b> | <b>Complications</b>                                 | <b>Follow-up (mean, month)</b> |
|-----------------------------------|---------------|-------------|----------------|-----------------------------------------------------------------------------------------------------|-----------------------------------------|------------------------------------------------------|--------------------------------|
| <b>Hashimoto, 2013[12]</b>        | R             | 5           | Japan          | n-BCA (4), n-BCA+PVA (1)                                                                            | 200 um                                  | none                                                 | 3.5                            |
| <b>Tempaku, 2015[25]</b>          | R             | 5           | Japan          | PVA (4), PVA+coil (1)                                                                               | 180-300 um                              | none                                                 | 17.6                           |
|                                   | R             |             |                |                                                                                                     |                                         | 2 surgical, 3 medical (not further specified)        |                                |
| <b>Kim, 2017[15]</b>              |               | 20          | Korea          | PVA (20)                                                                                            | 150-250 um                              |                                                      | 3.5                            |
| <b>Ban, 2018[7]</b>               | R             | 72          | Korea          | PVA (72)                                                                                            | 150-250 um                              | none                                                 | 6                              |
|                                   | R             |             |                |                                                                                                     |                                         |                                                      | At least 1.5 month             |
| <b>Link, 2018[16]</b>             |               | 45          | USA            | PVA (45)                                                                                            | 150-250 um                              | none                                                 |                                |
| <b>Nakagawa, 2019[18]</b>         | R             | 20          | Japan          | n-BCA (20)                                                                                          | n/a                                     | none                                                 | 6                              |
| <b>Ng, 2020[19]</b>               | P             | 21          | France         | PVA (21)                                                                                            | 150-250 um                              | none                                                 | 3                              |
|                                   | R             |             |                |                                                                                                     |                                         |                                                      |                                |
| <b>Okuma, 2019[20]</b>            |               | 17          | Japan          | n-BCA (11), embosphere (3), n-BCA+embosphere (2), coil (1)                                          | 300-500 um microsphere                  | none                                                 | 26.3                           |
| <b>Waqas, 2019[26]</b>            | R             | 8           | USA            | Onyx (n=8)                                                                                          | n/a                                     | none                                                 | 3.3                            |
|                                   | R             |             |                |                                                                                                     | ns,                                     |                                                      |                                |
|                                   |               |             |                |                                                                                                     | 7 patients "particles and/or coils"     | 1 CVA in type 3 aortic arch                          |                                |
| <b>Catapano, 2021[9]</b>          |               | 35          | USA            | Onyx (29), particles (7), n-BCA (5)                                                                 |                                         |                                                      | 4                              |
| <b>Fan, 2020[11]</b>              | R             | 7           | China          | Absolute alcohol (7)                                                                                | n/a                                     | none                                                 | N/A                            |
|                                   | R             |             |                |                                                                                                     |                                         |                                                      |                                |
|                                   |               |             |                |                                                                                                     | 100-300 or 300-500 um microsphere,      | 1 seizure, 1 delayed infarct, 1 intermittent aphasia |                                |
| <b>Joyce, 2020[13]</b>            |               | 135         | USA            | Coil (6), liquid (30), particles (38), liquid +coil (2), particles+coils (72), particles+liquid (1) | 150-250 or 250-355 PVA                  |                                                      | 6                              |

|                                        |   |     |        |                                                                                 |                                                                                 |                                                                                                                                                                           |     |
|----------------------------------------|---|-----|--------|---------------------------------------------------------------------------------|---------------------------------------------------------------------------------|---------------------------------------------------------------------------------------------------------------------------------------------------------------------------|-----|
|                                        | R |     |        |                                                                                 | ns, 5 coil alone<br>(imaging findings -<br>dangerous<br>anastomotic<br>vessels) | 1 asymptomatic<br>intra-procedure<br>MMA rupture, 1<br>seizure, 1 facial<br>droop                                                                                         |     |
| <b>Kan, 2021[14]</b>                   |   | 138 | USA    | Coils (5), liquid (37), liquid+coil (2),<br>particles (38), particles+coil (70) |                                                                                 |                                                                                                                                                                           | 3.2 |
| <b>Mureb, 2020[17]</b>                 | R | 8   | USA    | PVA + coil (8)                                                                  | 45-150 um, PVA<br>then coils                                                    | none                                                                                                                                                                      | 3   |
| <b>Rajah, 2020[22]</b>                 | R | 46  | USA    | Onyx 18 (36), onyx 34 (7), n-BCA<br>(1)                                         | na                                                                              | 1 bradycardia<br>during lidocaine<br>injection intra-op                                                                                                                   | 2   |
| <b>Shotar, 2020[24]</b>                | R | 89  | France | Microsphere (81), n-BCA (5), coil (5)                                           | 300-500 um<br>microspheres                                                      | 1 seizure, 1<br>headache, 2<br>diplopia, 1<br>meningomeningeal<br>fistula, 1 femoral<br>artery occlusion                                                                  | N/A |
| <b>Yajima, 2020[27]</b>                | R | 18  | Japan  | n-BCA (18)                                                                      | na                                                                              | none                                                                                                                                                                      | 8   |
| <b>Al-Mufti 2021[6]</b>                | P | 16  | USA    | n-BCA                                                                           | na                                                                              | none                                                                                                                                                                      | 3   |
| <b>Carpenter 2021[8]</b>               | R | 44  | USA    | PVA                                                                             | 45-150 um                                                                       | 7 Seizures, 3 UTI,<br>4 AKI, 1 stroke, 1<br>pneumonia, 1<br>DVT/PE<br>(complications in<br>15 total patients as<br>more than 1<br>complication may<br>occur in 1 patient) | 3   |
| <b>Enriquez-Marulanda<br/>2021[10]</b> | R | 45  | USA    | PVA + coils (43), coils (2) - Most<br>MMA embolization procedures were          | ns                                                                              | 1 complication not<br>specified                                                                                                                                           | 2   |

performed with a combination of distal penetration with polyvinyl particles of 150 to 250 microns followed by coil embolization for permanent trunk occlusion of the MMA (95.6%) while remaining cases (n = 2) were treated with coils only (due to an anastomosis of the MMA with the ophthalmic artery conferring a higher risk of blindness after particulate embolization migration)

|                         |   |    |         |                  |            |      |     |
|-------------------------|---|----|---------|------------------|------------|------|-----|
| <b>Onyinzo 2021[21]</b> | R | 50 | Germany | PVA and/or coils | 45-150 um  | none | 3.4 |
| <b>Schwarz 2021[23]</b> | R | 44 | USA     | PVA              | 250-350 um | none | 12  |

**Abbreviations:** AKI, acute kidney injury; DVT, deep venous thrombosis; NA, not available; NS, not specified; P, prospective; PE, pulmonary embolism; R, retrospective; UTI, urinary tract infection.

## RISK OF BIAS (ROB)

Newcastle-Ottawa Quality Assessment Scale for Case-Control Studies tool was after modification to assess the risk of bias in our included studies. This modification is focusing on four questions which included: 1) did the study include all patients or consecutive patients versus a selected sample?; 2) was the study retrospective or prospective?; 3) was angiographic and clinical follow-up satisfactory, thus allowing for ascertainment of all outcomes?; and, 4) were outcomes clearly reported?

### Cohort Studies (Newcastle Ottawa Scale)

- For non-comparative cohort studies: the maximum cumulative value: 4, the maximum values were as follows: Selection: 3, Outcome: 2.  
(4-5: Low, 3: Moderate, 0-2: High ROB).
- For comparative cohort studies: the maximum cumulative value: 7, the maximum values are as follows: Selection: 4, Comparability: 2, Outcome: 2.  
(7-8: Low, 3-6: Moderate, 0-2: High ROB)

- **Selection**

1. Representativeness of the exposed cohort
2. Selection of the non-exposed cohort (Comparative studies)
3. Ascertainment of exposure.
4. Study design (Prospective or Retrospective)

- **Comparability (Comparative studies)**

1. Evaluation of the most important outcome.
2. Evaluation of additional outcomes.

- **Outcome**

1. Assessment of outcome.
2. Sufficient follow-up ( $\geq 3$  months)

**Supplemental Table 2:** Risk of bias assessment.

| Study (et al), Year | Design | ROB     | Selection | Comparability | Outcome |
|---------------------|--------|---------|-----------|---------------|---------|
| Hashimoto, 2013[12] | R      | 3 (Mod) | 1         | None          | 2       |
| Tempaku, 2015[25]   | R      | 3 (Mod) | 1         | None          | 2       |
| Kim, 2017[15]       | R      | 7 (Low) | 3         | 2             | 2       |
| Ban, 2018[7]        | R      | 3 (Mod) | 1         | None          | 2       |
| Link, 2018[16]      | R      | 3 (Mod) | 2         | None          | 1       |
| Nakagawa, 2019[18]  | R      | 3 (Mod) | 1         | None          | 2       |
| Ng, 2020[19]        | P      | 7 (Low) | 4         | 1             | 2       |

|                                    |   |          |   |      |   |
|------------------------------------|---|----------|---|------|---|
| <b>Okuma, 2019[20]</b>             | R | 3 (Mod)  | 1 | None | 2 |
| <b>Waqas, 2019[26]</b>             | R | 3 (Mod)  | 1 | None | 2 |
| <b>Catapano, 2021[9]</b>           | R | 4 (Low)  | 2 | None | 2 |
| <b>Fan, 2020[11]</b>               | R | 2 (High) | 1 | None | 1 |
| <b>Joyce, 2020[13]</b>             | R | 3 (Mod)  | 1 | None | 2 |
| <b>Kan, 2021[14]</b>               | R | 4 (Low)  | 2 | None | 2 |
| <b>Mureb, 2020[17]</b>             | R | 4 (Low)  | 2 | None | 2 |
| <b>Rajah, 2020[22]</b>             | R | 3 (Mod)  | 1 | None | 2 |
| <b>Shotar, 2020[24]</b>            | R | 3 (Mod)  | 2 | None | 1 |
| <b>Yajima, 2020[27]</b>            | R | 4 (Low)  | 2 | None | 2 |
| <b>Al-Mufti 2021[6]</b>            | P | 4 (Low)  | 3 | None | 2 |
| <b>Carpenter 2021[8]</b>           | R | 4 (Mod)  | 1 | 1    | 2 |
| <b>Enriquez-Marulanda 2021[10]</b> | R | 6 (Mod)  | 2 | 2    | 2 |
| <b>Onyinzo 2021[21]</b>            | R | 6 (Mod)  | 2 | 2    | 2 |
| <b>Schwarz 2021[23]</b>            | R | 3 (Mod)  | 1 | None | 2 |

**Supplemental Table 3:** Subgroup meta-analysis outcomes.

| Outcome                             | Subgroup meta-analysis results                       |                                                          |              |                           |
|-------------------------------------|------------------------------------------------------|----------------------------------------------------------|--------------|---------------------------|
|                                     | Rates following<br>embolization alone<br>(%, 95% CI) | Rates following<br>embolization + surgery<br>(%, 95% CI) | P<br>value   | <i>I</i> <sup>2</sup> (%) |
| <b>SDH recurrence</b>               | 6.3 (3.3–9.3)                                        | 5.3 (2.7–7.9)                                            | 0.976        | 0.000                     |
| <b>SDH recurrence (Person-Time)</b> | 1.7 (0.7–2.6)/month                                  | 0.3 (0.0–0.6)/month                                      | <b>0.035</b> | 11.91                     |
| nBCA                                | 3.5 (0.0, 8.1)                                       |                                                          |              | 0.000                     |
| <b>nBCA (Person-Time)</b>           | 0.5 (0.0, 1.2)/month                                 |                                                          |              | 0.000                     |
| Onyx                                | 2.0 (0.0, 6.4)                                       |                                                          |              | 0.000                     |
| <b>Onyx (Person-Time)</b>           | 0.7 (0.0, 2.2)/month                                 |                                                          |              | 0.000                     |
| PVA                                 | 4.7 (1.5, 8.0)                                       |                                                          |              | 27.49                     |
| <b>PVA (Person-Time)</b>            | 0.5 (0.0, 1.2)/month                                 |                                                          |              | 27.86                     |
| PVA +/- coils                       | 2.2 (0.0, 5.1)                                       |                                                          |              | 0.000                     |
| <b>PVA +/- coils (Person-Time)</b>  | 0.7 (0.0, 1.7)/month                                 |                                                          |              | 0.000                     |
| Overall                             | 2.9 (1.3, 4.4)                                       |                                                          |              | 0.000                     |
| <b>Overall (Person-Time)</b>        | 0.5 (0.0, 1.2)/month                                 |                                                          |              | 0.000                     |
| <b>SDH re-operation</b>             | 5.4 (2.6–8.2)                                        | 4.6 (2.0–7.2)                                            | 0.912        | 0.000                     |
| nBCA                                | 3.7 (0.0, 8.2)                                       |                                                          |              | 0.000                     |
| Onyx                                | 2.0 (0.0, 6.4)                                       |                                                          |              | 0.000                     |
| PVA                                 | 4.2 (1.2, 7.3)                                       |                                                          |              | 26.83                     |
| PVA +/- coils                       | 4.1 (1.0, 7.3)                                       |                                                          |              | 12.94                     |
| Overall                             | 3.3 (1.8, 4.8)                                       |                                                          |              | 0.000                     |
| <b>Complication</b>                 | 2.2 (0.6–4.0)                                        | 5.5 (1.5–9.5)                                            | <b>0.025</b> | 43.18                     |
| nBCA                                | 3.0 (0.0, 6.9)                                       |                                                          |              | 0.000                     |
| Onyx                                | 2.0 (0.0, 6.4)                                       |                                                          |              | 0.000                     |
| PVA                                 | 5.6 (1.1, 10.1)                                      |                                                          |              | <b>79.28</b>              |

|                                |                  |                   |       |              |
|--------------------------------|------------------|-------------------|-------|--------------|
| PVA +/- coils                  |                  | 1.4 (0.0, 3.7)    |       | 0.000        |
| Overall                        |                  | 2.8 (0.0, 4.8)    |       | 47.96        |
| <b>Good radiologic outcome</b> | 94.1 (84.8–100)  | 92.1 (85.8–98.5)  | 0.187 | 0.000        |
| Onyx                           |                  | 82.0 (57.0, 100)  |       | <b>79.65</b> |
| PVA +/- coils                  |                  | 84.4 (63.9, 100)  |       | <b>87.37</b> |
| Overall                        |                  | 83.6 (69.5, 97.6) |       | <b>81.55</b> |
| <b>Good clinical outcome</b>   | 81.2 (66.7–95.6) | 75.3 (36–100)     | 0.569 | <b>71.81</b> |
| nBCA                           |                  | 78.5 (55.9, 100)  |       | 51.06        |
| Onyx                           |                  | 75.7 (63.8, 87.5) |       | 17.99        |
| PVA +/- coils                  |                  | 85.2 (68.1, 100)  |       | <b>82.6</b>  |
| Overall                        |                  | 81.0 (71.4, 90.6) |       | <b>64.98</b> |

**Abbreviations:** CI, confidence interval, n, nominator; nBCA, N-butyl-2-cyanoacrylate; PVA, polyvinyl alcohol, SDH, subdural hematoma;

**Supplemental Table 4:** Pairwise meta-analysis outcomes.

| Outcome                        | No. of Studies | Sample Size |                    | Random Effect     |                | Heterogeneity    |          |                           |
|--------------------------------|----------------|-------------|--------------------|-------------------|----------------|------------------|----------|---------------------------|
|                                |                | MMA         | Combined treatment | OR (95% CI)       | <i>P</i> value | Tau <sup>2</sup> | <i>P</i> | <i>I</i> <sup>2</sup> (%) |
| <b>SDH recurrence</b>          | 5              | 180         | 674                | 0.36 (0.12–1.09)  | 0.071          | 0.640            | 0.144    | 41.63                     |
| PVA                            | 3              | 85          | 235                | 0.53 (0.13–2.15)  | 0.372          |                  | 0.176    | 42.39                     |
| PVA +/- coils                  | 2              | 77          | 439                | 0.17 (0.04–0.77)  | <b>0.021</b>   |                  | 0.324    | 0.000                     |
| Overall                        |                |             |                    |                   | 0.071          |                  |          |                           |
| <b>SDH re-operation</b>        | 8              | 382         | 1373               | 0.48 (23.4–99.1)  | <b>0.047</b>   | 0.364            | 0.130    | 37.49                     |
| PVA                            | 4              | 157         | 637                | 0.39 (0.10–1.49)  | 0.168          |                  | 0.136    | 45.96                     |
| PVA +/- coils                  | 3              | 184         | 613                | 0.40 (0.17–0.94)  | <b>0.035</b>   |                  | 0.240    | 30.01                     |
| Overall                        |                |             |                    |                   | <b>0.013</b>   |                  |          |                           |
| <b>Complication</b>            | 7              | 341         | 1250               | 0.81 (0.49–1.33)  | 0.407          | 0.000            | 0.522    | 0.000                     |
| PVA                            | 3              | 113         | 450                | 1.03 (0.23–4.59)  | 0.967          |                  | 0.236    | 0.000                     |
| PVA +/- coils                  | 2              | 95          | 439                | 0.37 (0.07–1.96)  | 0.241          |                  | 0.342    | 0.000                     |
| Overall                        |                |             |                    |                   | 0.568          |                  |          |                           |
| <b>Good radiologic outcome</b> | 3              | 108         | 530                | 1.72 (0.16–18.7)  | 0.657          | 4.005            | <.001    | <b>94.51</b>              |
| <b>Good clinical outcome</b>   | 3              | 96          | 462                | 0.88 (0.31–2.49)  | 0.308          | 0.446            | 0.130    | <b>51.01</b>              |
| Outcome                        | No. of Studies | MMA         | Conservative       | OR (95% CI)       | <i>P</i> value | Tau <sup>2</sup> | <i>P</i> | <i>I</i> <sup>2</sup> (%) |
| SDH re-operation               | 2              | 113         | 226                | 0.02 (0.00–1.67)  | 0.085          | 8.251            | 0.004    | <b>88.16</b>              |
| Outcome                        | No. of Studies | Surgery     | Conservative       | OR (95% CI)       | <i>P</i> value | Tau <sup>2</sup> | <i>P</i> | <i>I</i> <sup>2</sup> (%) |
| SDH re-operation               | 2              | 525         | 226                | 0.02 (0.00–45.78) | 0.334          | 28.95            | 0.130    | 37.49                     |

**Abbreviations:** CI, confidence interval, n, nominator; nBCA, N-butyl-2-cyanoacrylate; PVA, polyvinyl alcohol, SDH, subdural hematoma;

**Supplemental figure 1:** Flow diagram of study selection process.

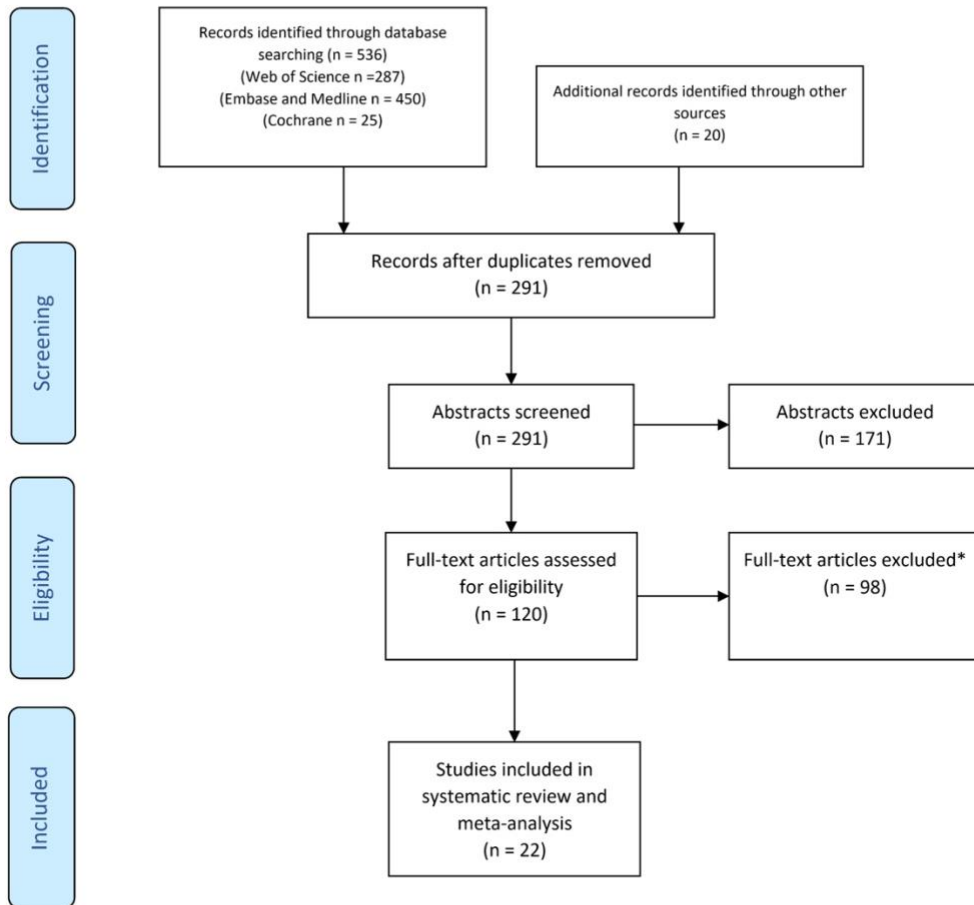

\* Reasons for exclusion include: articles not written in English, less than 5 patients in each treatment group, larger cohort of the same population reported elsewhere, conference abstracts, review articles, studies of acute subdural hematoma.

**Supplemental figure 2:** Forest plots of the outcomes; **A)** Intraprocedural complete occlusion of MMA, **B)** Subdural hematoma recurrence, **C)** Subdural hematoma recurrence per month (Person-Time analysis), **D)** Re-operation, **E)** Complication rate, **F)** Good radiologic outcomes, **G)** Good clinical outcomes, **H)** Rate of decrease in postoperative decrease SDH volume, and **I)** Rate of decrease in postoperative decrease SDH width.

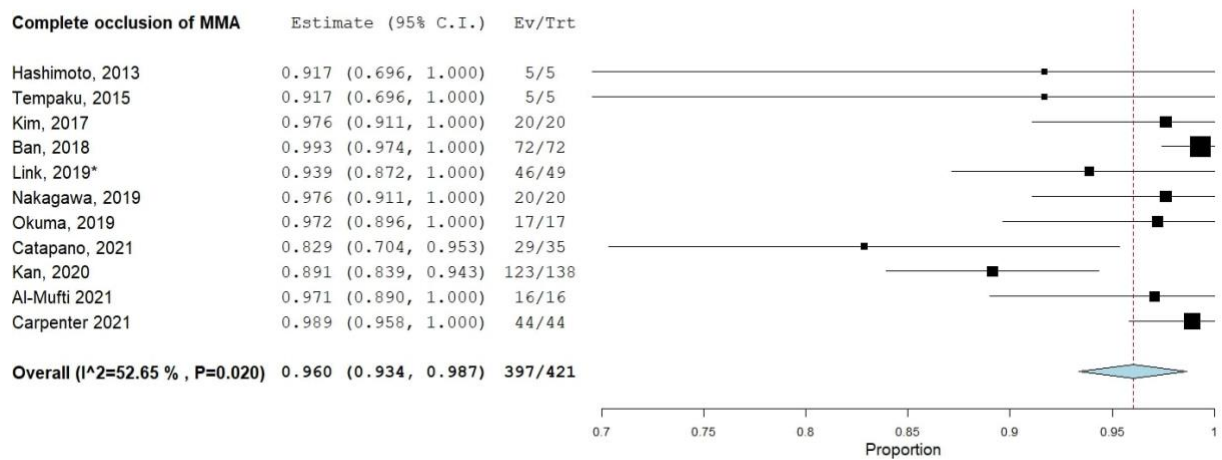

# SDH recurrence

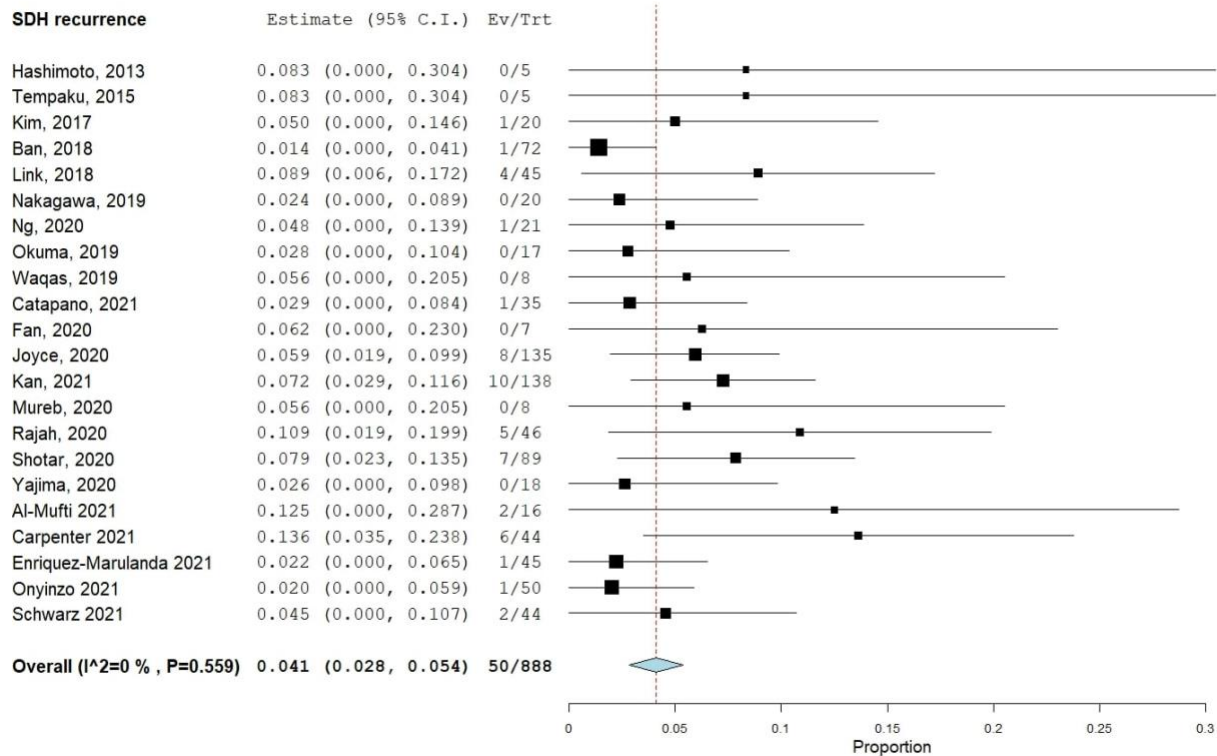

# SDH recurrence (Person-time)

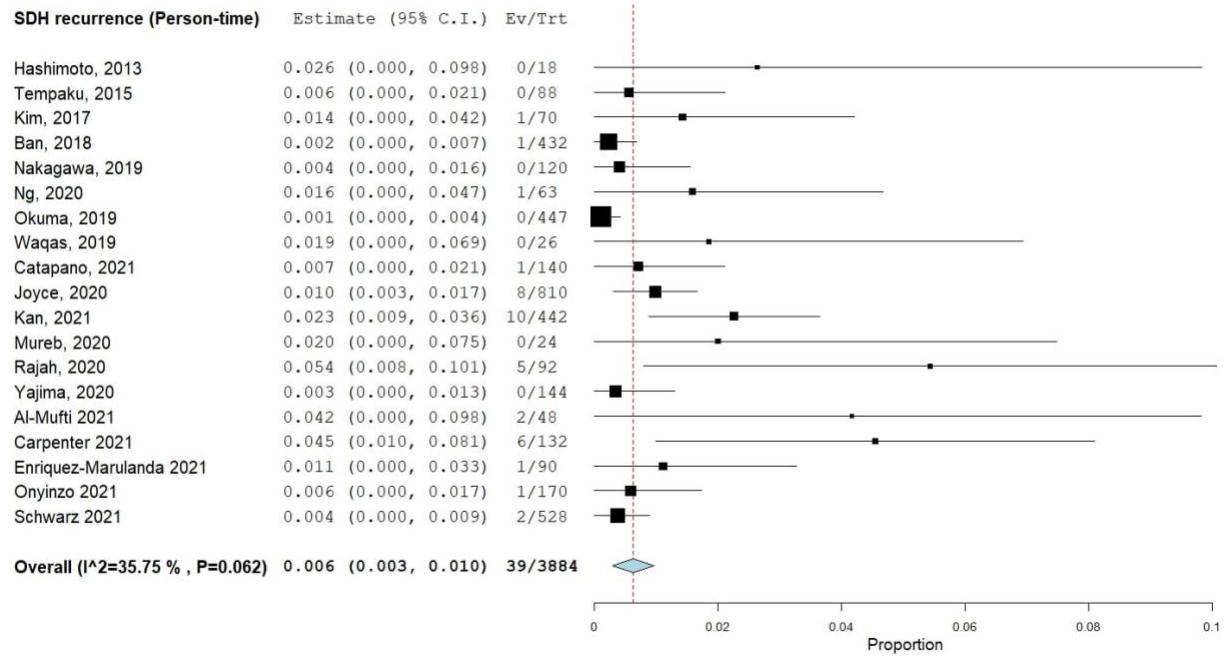

# Re-operation

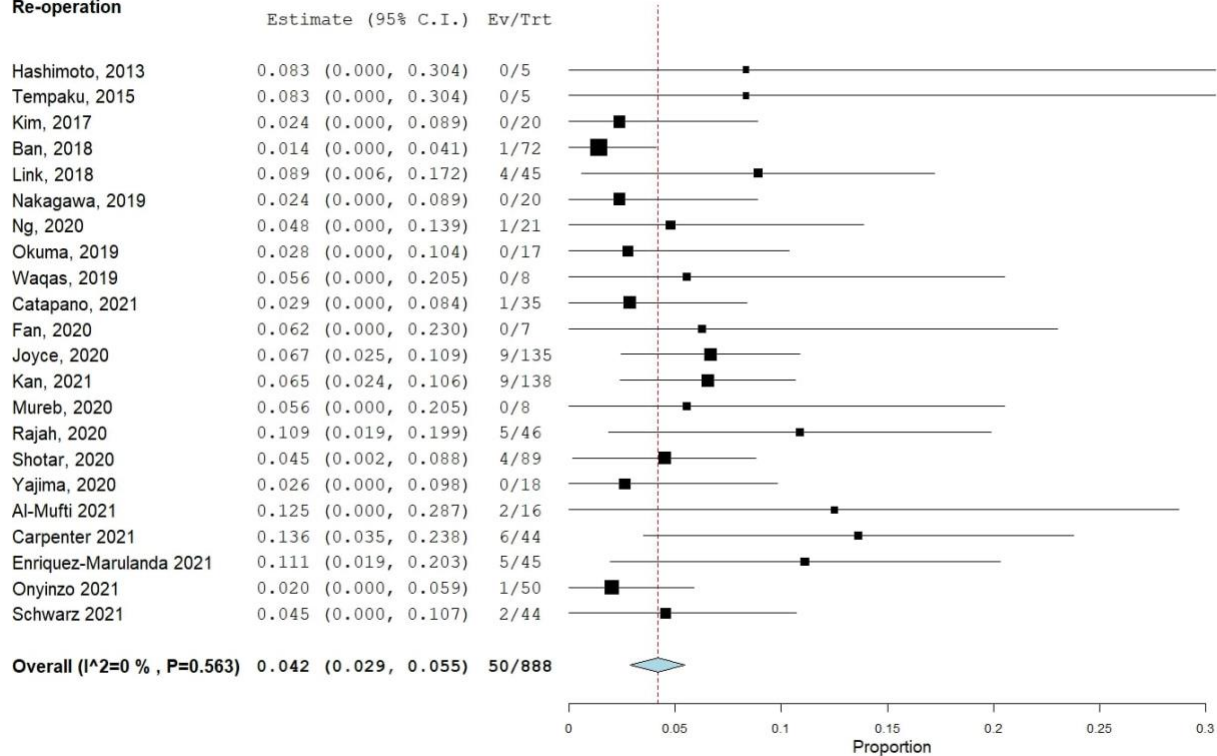

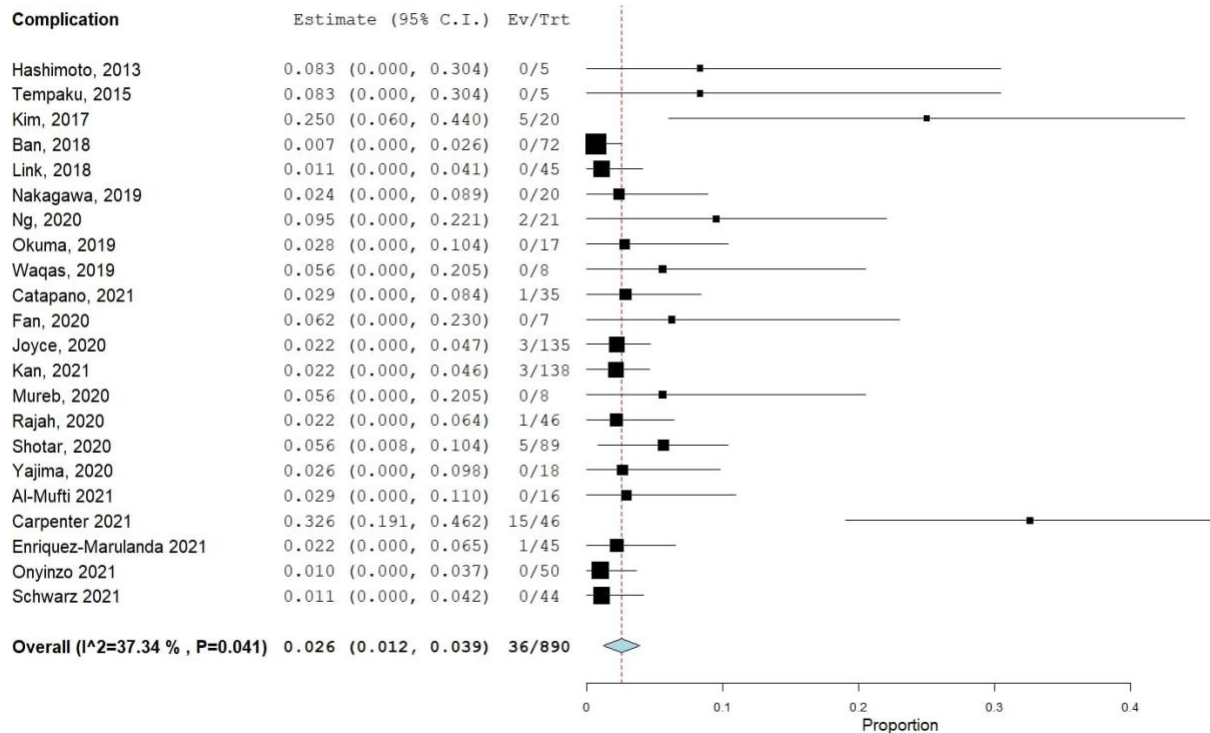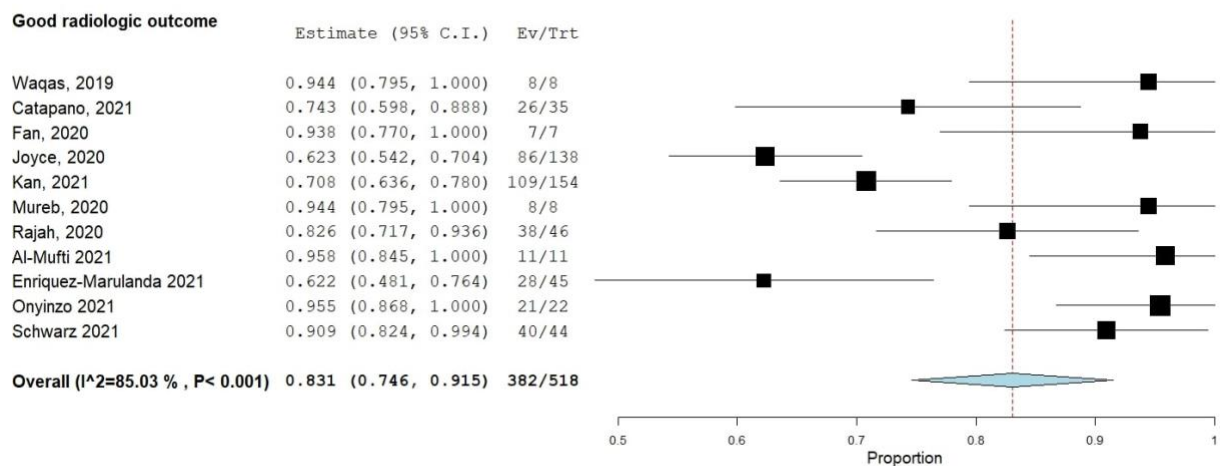

### Good clinical outcome

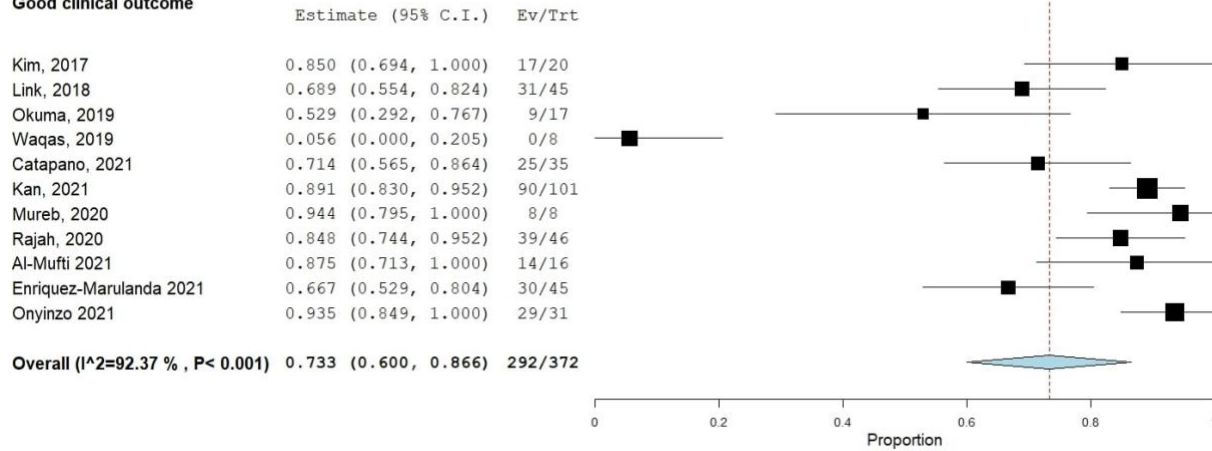

### SDH volume decrease

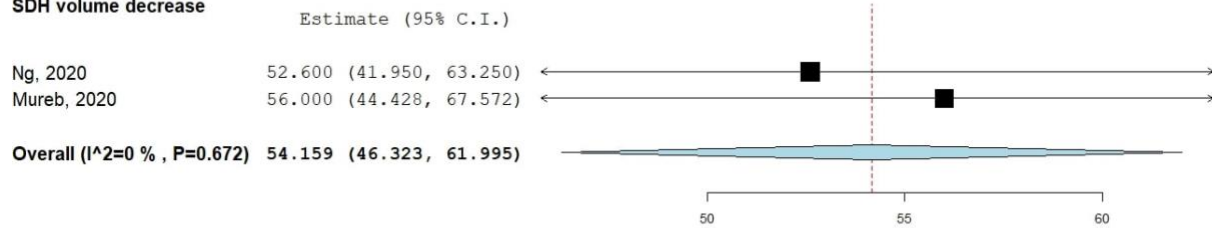

### SDH width decrease

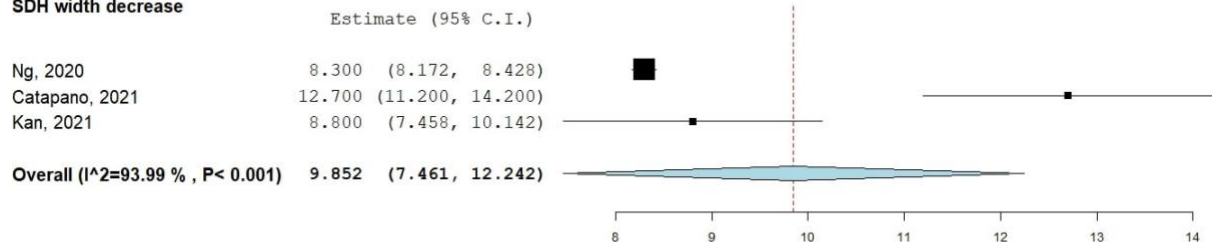

**Supplemental figure 3:** Forest plot (A) and funnel plot trim and fill approach (B) of good radiologic outcome.

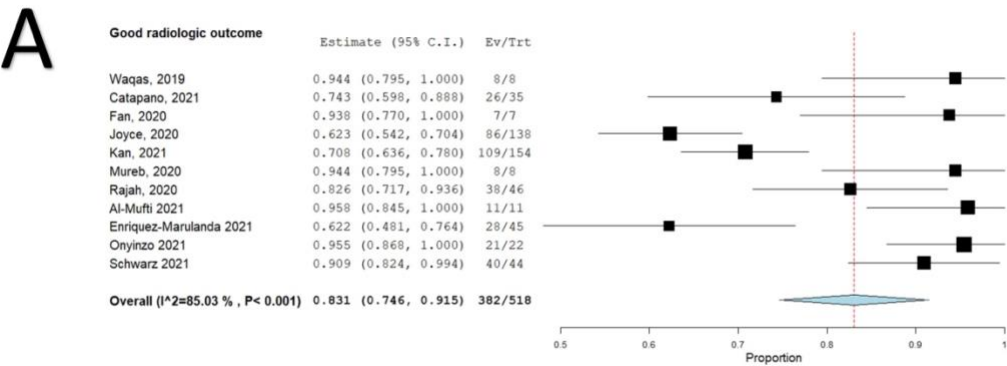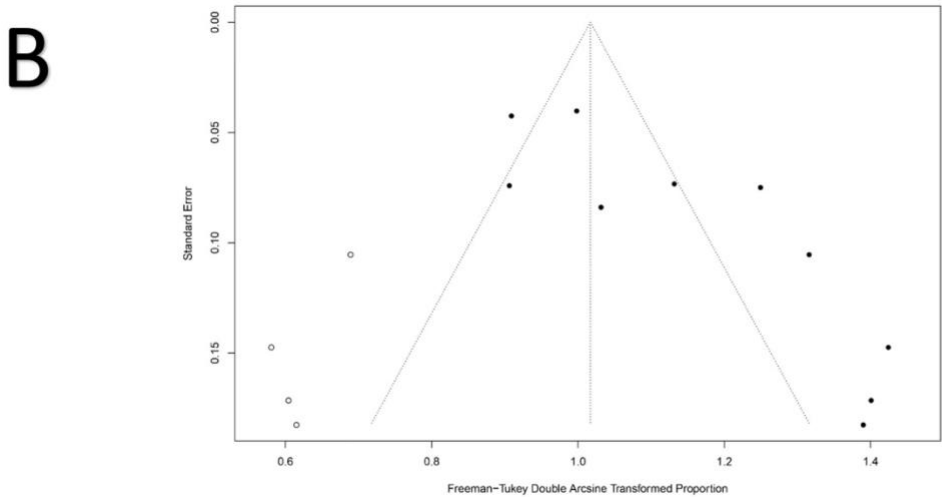

Supplement: 0697.pdf [file 0697.pdf]
